# Supplementary material
Source: publisher figshare collection journal article supplement (https://acs.figshare.com/ndownloader/files/9554392)
Supplement: Supplementary file 1 [file 9554392]

Supporting Information:

Role of metal cations in plasmon-catalyzed oxidation: a case study of dimerization of *p*-aminothiophenol

Zhiyang Zhang<sup>a,b</sup>, Virginia Merk<sup>a</sup>, Anja Hermanns<sup>b</sup>, Wolfgang E. S. Unger<sup>b</sup>, and Janina Kneipp<sup>a,b\*</sup>

<sup>a</sup> Humboldt-Universität zu Berlin, Department of Chemistry and School of Analytical Sciences Adlershof (SALSA), Brook-Taylor-Str. 2, 12489 Berlin, Germany

<sup>b</sup> BAM Federal Institute for Materials Research and Testing, Richard-Willstätter-Str. 11, 12489 Berlin, Germany

\*E-mail: [janina.kneipp@chemie.hu-berlin.de](mailto:janina.kneipp@chemie.hu-berlin.de)

## Supporting Figures

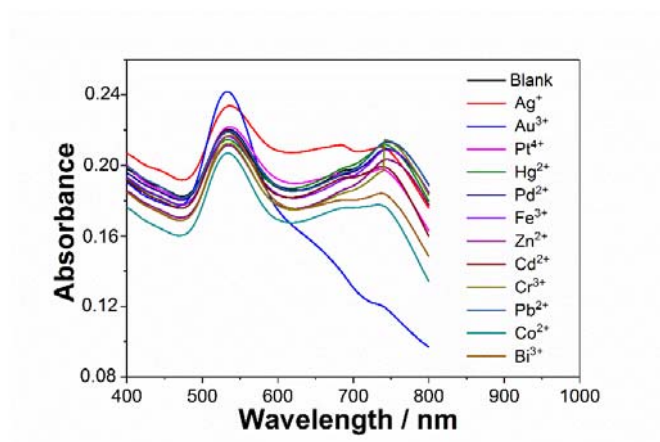

**Figure S1** UV-Vis spectra of gold nanoparticles functionalized with PATP at pH 9 in the presence of different metal ions.

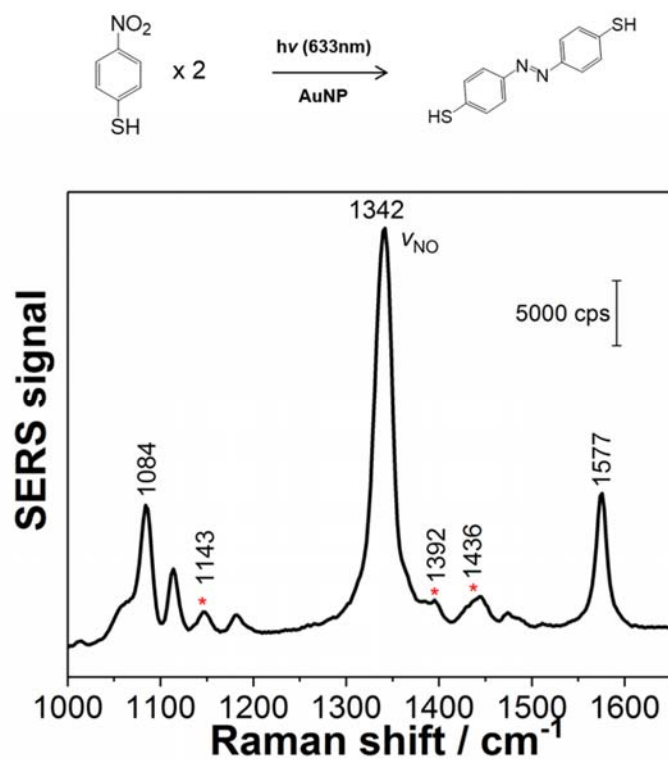

**Figure S2** SERS spectra of immobilized gold nanoparticles modified with PNTP after irradiation for 6 s. ( $\lambda_{\text{excitation}} = 633 \text{ nm}$ ; laser intensity:  $500 \text{ kW/cm}^2$ ). \* marked peaks are representative of DMAB.

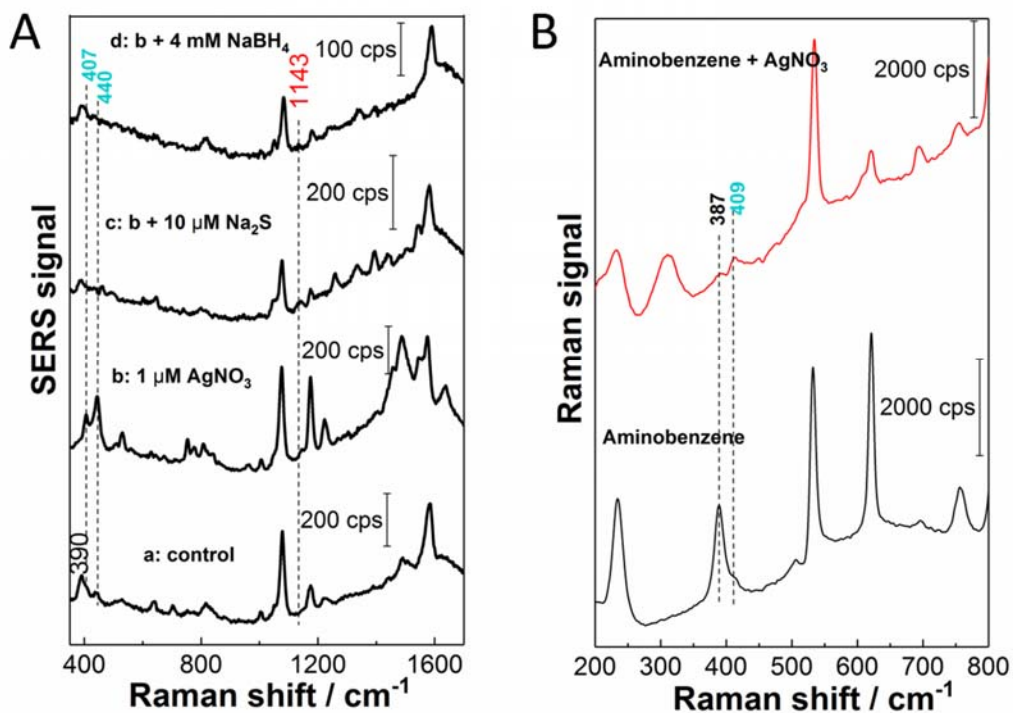

**Figure S3** (A) SERS spectra of gold nanoparticles (0.044 nM) with PATP (0.25 μM) at pH 2 (a) before and (b) after incubation with 1.0 μM Ag<sup>+</sup> (control) (c) with further addition of Na<sub>2</sub>S, and (d) NaBH<sub>4</sub>. (B) Normal Raman spectra of aminobenzene before (black trace) and after adding AgNO<sub>3</sub> (red trace). ( $\lambda_{\text{excitation}} = 633 \text{ nm}$ ; laser intensity: 500 kW/cm<sup>2</sup>)

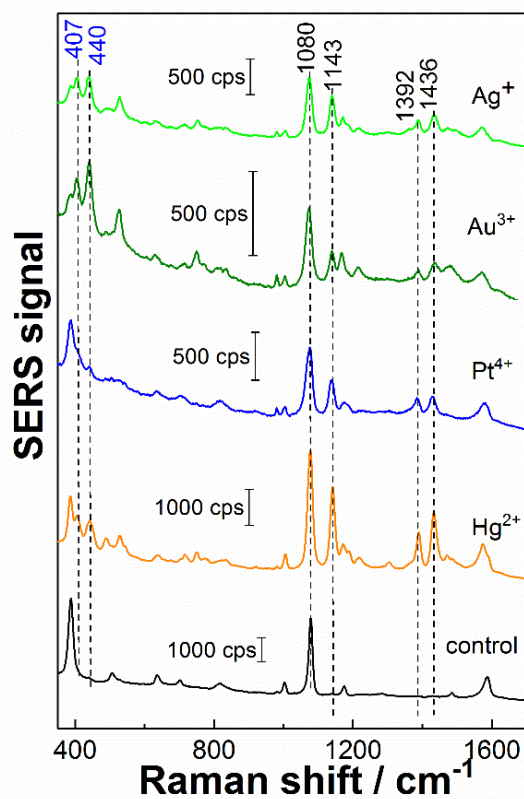

**Figure S4** SERS spectra (averages of 10 measurements) of gold nanoparticles with PATP at pH 9 before and after incubation with 1  $\mu\text{M}$  Ag<sup>+</sup>, 2  $\mu\text{M}$  Au<sup>3+</sup>, 5  $\mu\text{M}$  Pt<sup>4+</sup> and 10  $\mu\text{M}$  Hg<sup>2+</sup> ions. ( $\lambda_{\text{exc}} = 785 \text{ nm}$ ; laser intensity:  $1.84 \times 10^6 \text{ W/cm}^2$ , acquisition time 1 s).

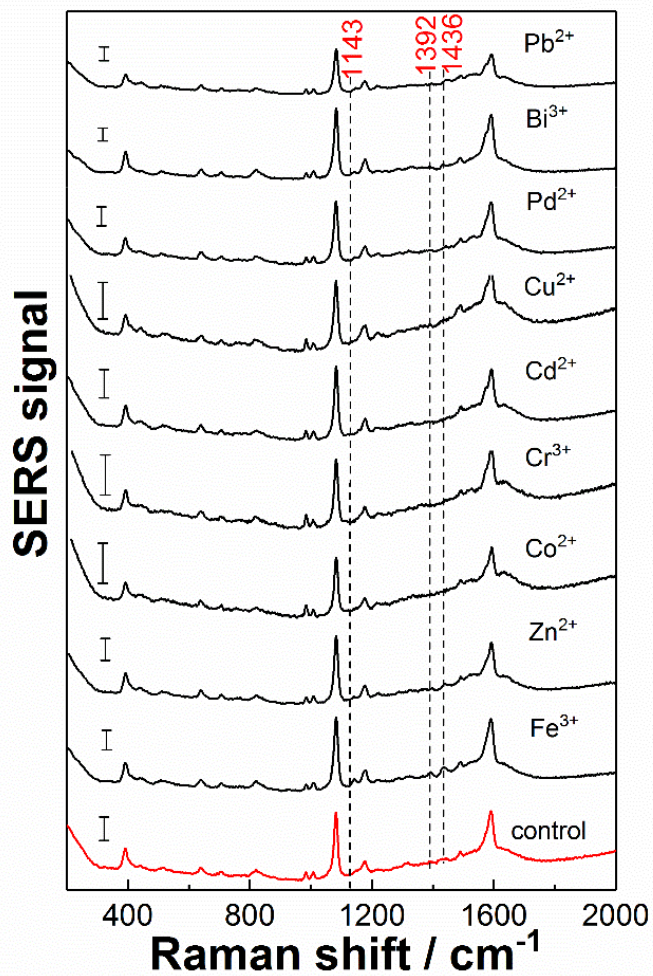

**Figure S5** SERS spectra (averages of 10 measurements) of gold nanoparticles with PATP at pH 9 before and after incubation with different metal ions for 10 min at room temperature. ( $\lambda_{\text{excitation}} = 633 \text{ nm}$ ; laser intensity:  $500 \text{ kW/cm}^2$ , acquisition time 1s) Scale bars: 200 cps.

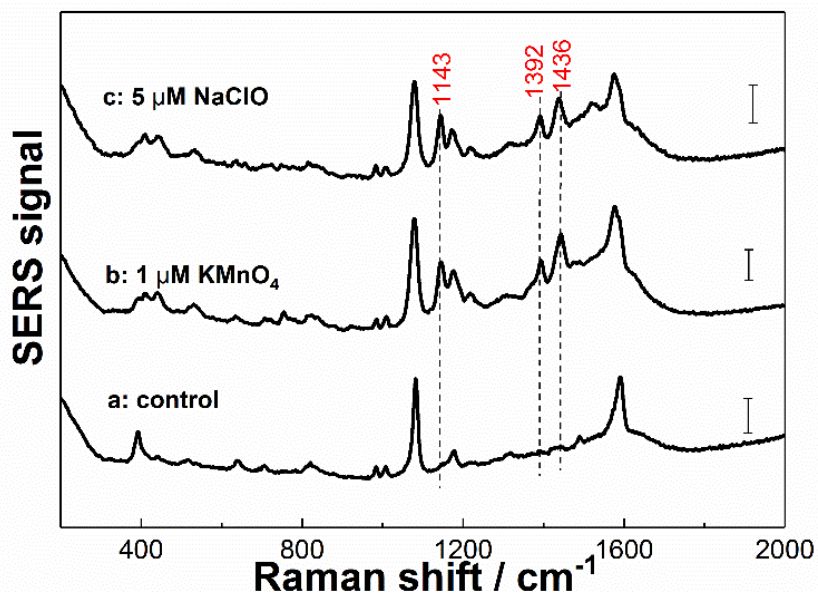

**Figure S6** SERS spectra of gold nanoparticles with PATP at pH 9 before and after incubation with 1.0 μM KMO<sub>4</sub> and 5 μM NaClO for 10 min at room temperature. ( $\lambda_{\text{exc}} = 633 \text{ nm}$ ; laser intensity: 500 kW/cm<sup>2</sup>, acquisition time 1 s). Scale bars: 200 cps

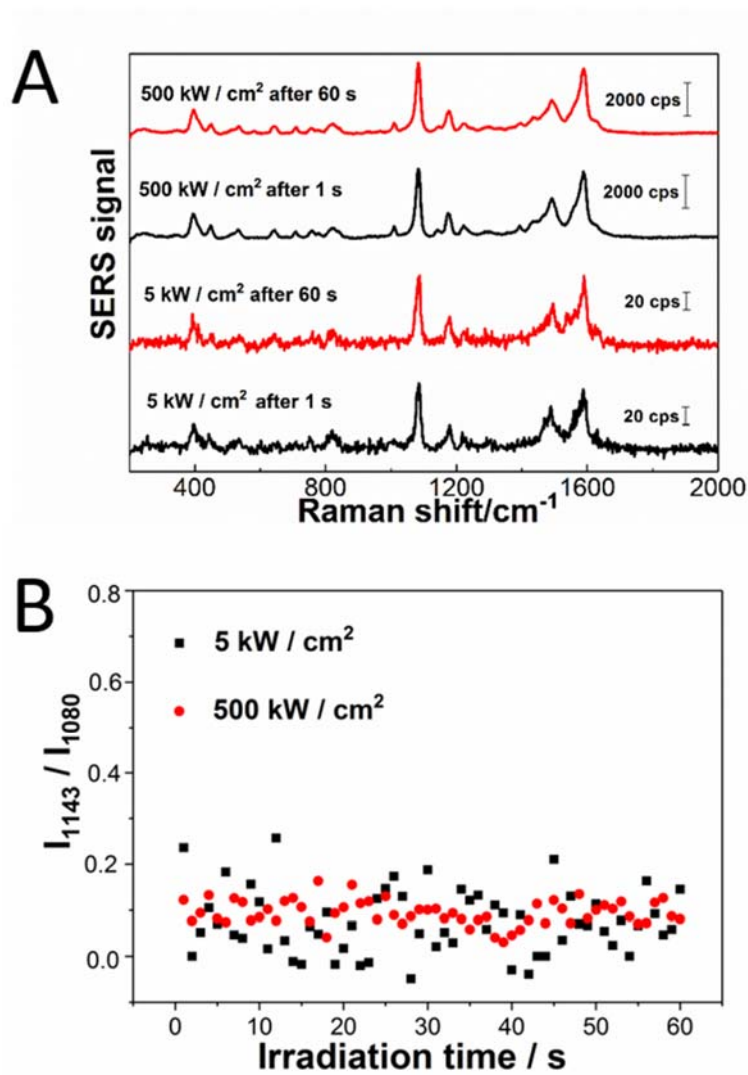

**Figure S7** (A) SERS spectra of gold nanoparticles with PATP obtained after irradiation with a laser intensity of 5 kW/cm<sup>2</sup> and 500 kW/cm<sup>2</sup> after 1 s (black traces) and 60 s (red traces), respectively. (B) Signal intensity ratio  $I_{1143}/I_{1080}$  in the SERS spectra of gold nanoparticles with PATP in the absence of Ag<sup>+</sup> at pH 9 as a function of irradiation time using an intensity of 5 kW/cm<sup>2</sup> (black squares) and 500 kW/cm<sup>2</sup> (red dots). ( $\lambda_{\text{excitation}} = 633$  nm, acquisition time: 1 s) Spectra were excited with the same laser intensity as that used for irradiation.



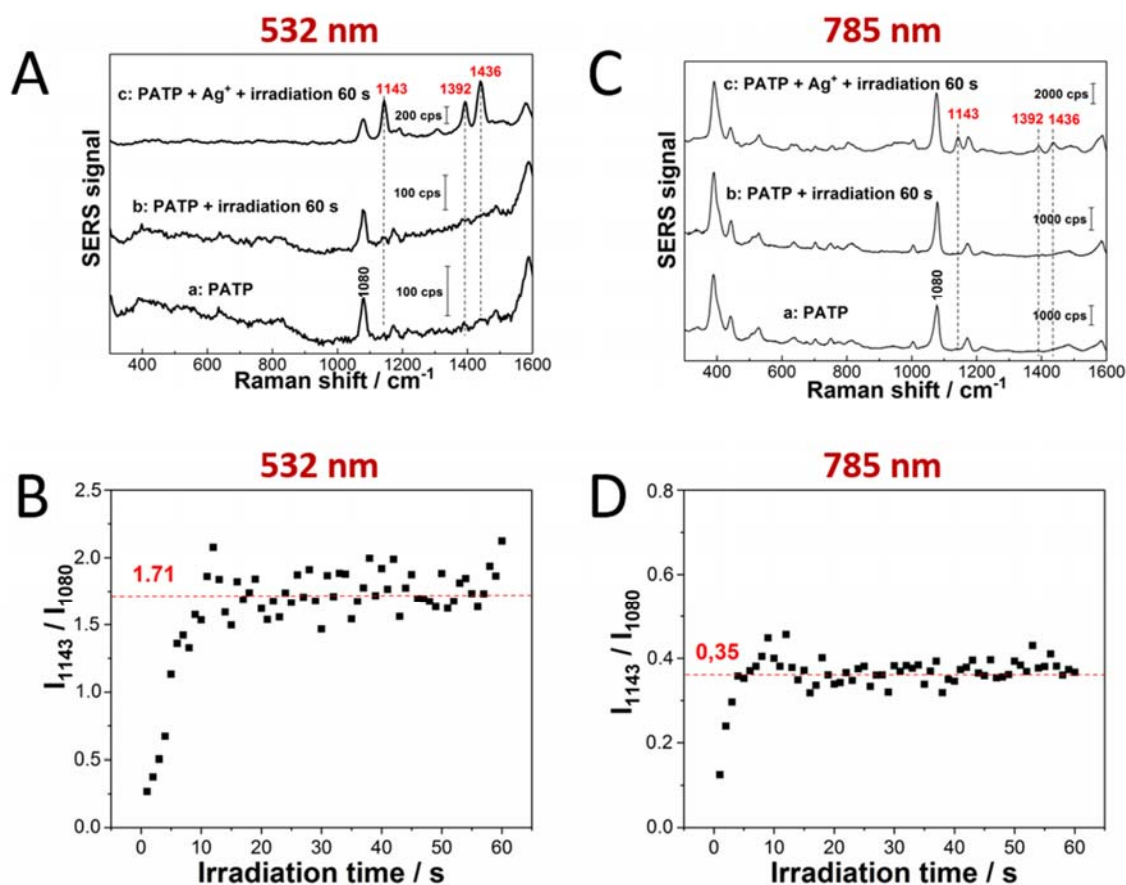

**Figure S8** SERS spectra of gold nanoparticles with PATP in the absence and presence of  $\text{Ag}^+$  before and after irradiation for 60 s using **(A)** an excitation laser at 532 nm with an intensity of  $1.4 \times 10^6 \text{ W/cm}^2$  and **(C)** an excitation laser at 785 nm with an intensity of  $4.6 \times 10^5 \text{ W/cm}^2$  **(B)** and **(D)** Signal intensity ratio  $I_{1143}/I_{1080}$  determined from SERS spectra obtained in the presence of  $\text{Ag}^+$  as a function of irradiation time with the two laser wavelengths, respectively.

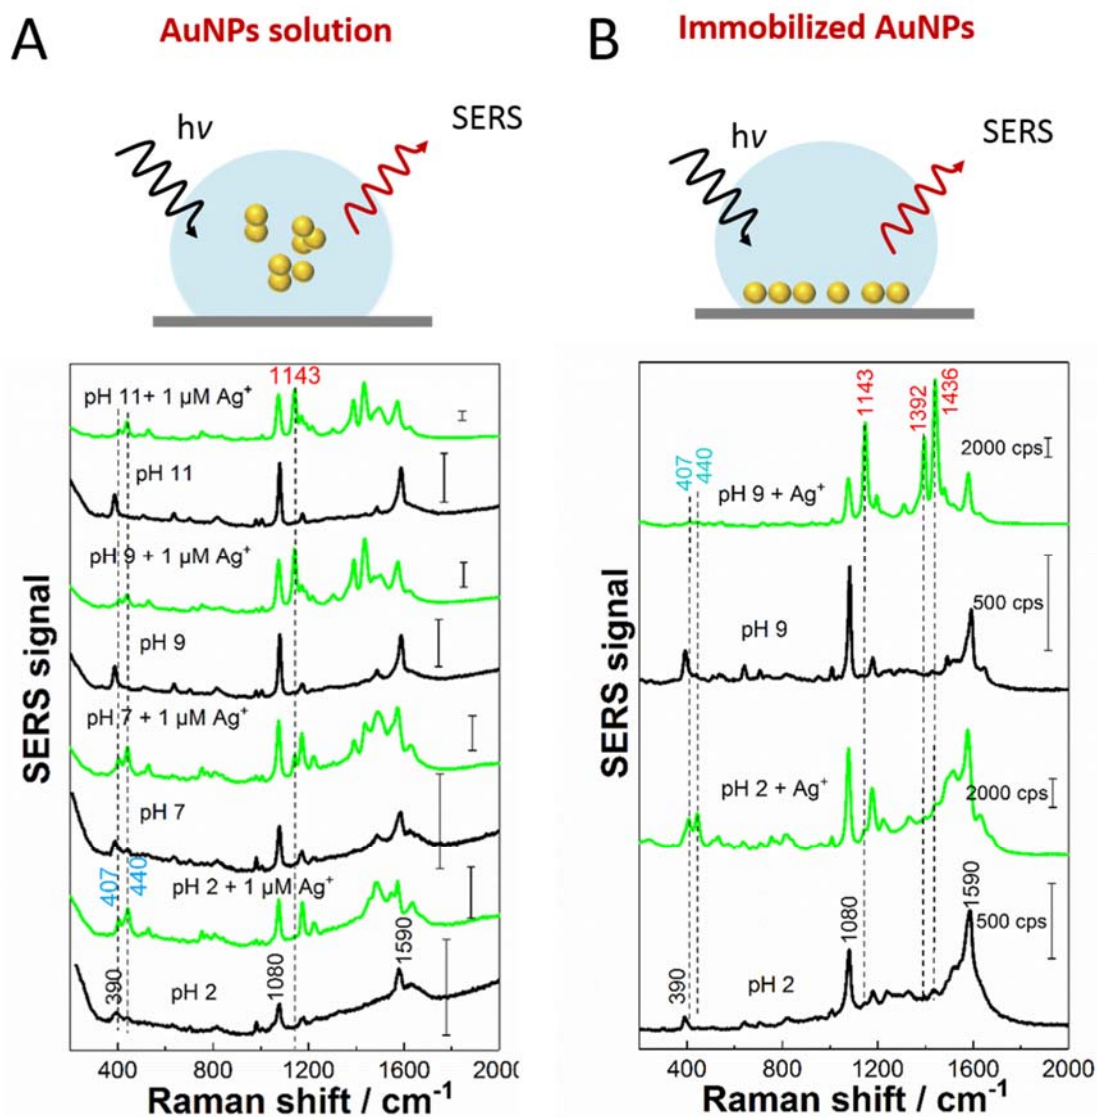

**Figure S9** (A) SERS spectra of gold nanoparticles with PATP in the absence and presence of  $\text{Ag}^+$  at pH 2, pH 7, pH 9, and pH 11, respectively ( $\lambda_{\text{excitation}} = 633 \text{ nm}$ ; laser intensity:  $500 \text{ kW/cm}^2$ , acquisition time 1s). Scale bars: 200 cps. (B) SERS spectra of immobilized gold nanoparticles functionalized with PATP on a glass slide before and after incubation with  $\text{Ag}^+$  at pH 2 and pH 9 ( $\lambda_{\text{excitation}} = 633 \text{ nm}$ , laser intensity  $50 \text{ W/cm}^2$ , acquisition time: 1 s).

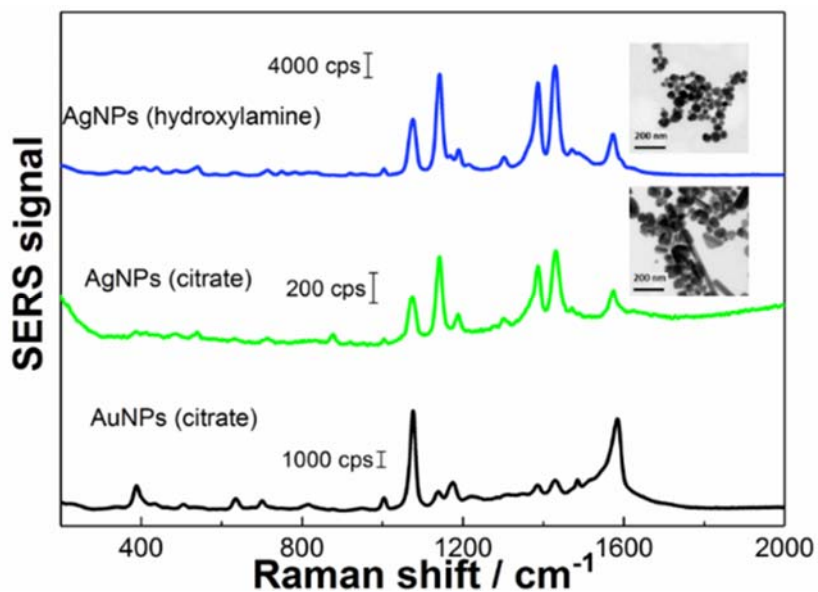

**Figure S10** SERS spectra of citrate reduced gold nanoparticles, citrate reduced<sup>1</sup> silver nanoparticles, and hydroxylamine reduced<sup>2</sup> silver nanoparticles with PATP. Insets: TEM images of citrate reduced and hydroxylamine reduced silver nanoparticles. ( $\lambda_{\text{excitation}} = 633 \text{ nm}$ ; laser intensity:  $500 \text{ kW/cm}^2$ , acquisition time 1 s).

## References

- (1) Lee, P.; Meisel, D. *J. Phys. Chem.* **1982**, *86*, 3391-3395.
- (2) Leopold, N.; Lendl, B. *J. Phys. Chem. B* **2003**, *107*, 5723-5727.
